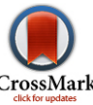

## Correction

# Correction: Six Homeoproteins and a linc-RNA at the Fast MYH Locus Lock Fast Myofiber Terminal Phenotype

The *PLOS Genetics* Staff

## Notice of Republication

In the HTML version of the manuscript there was an error in the title where the L of “linc-RNA” was replaced with an I. The first and last name of the corresponding author was also reversed. The pdf of the manuscript was unaffected. These errors are now corrected.

## Reference

1. Sakakibara I, Santolini M, Ferry A, Hakim V, Maire P (2014) Six Homeoproteins and a linc-RNA at the Fast MYH Locus Lock Fast Myofiber Terminal Phenotype. *PLoS Genet* 10(5): e1004386, . doi:10.1371/journal.pgen.1004386

**Citation:** The *PLOS Genetics* Staff (2014) Correction: Six Homeoproteins and a linc-RNA at the Fast MYH Locus Lock Fast Myofiber Terminal Phenotype. *PLoS Genet* 10(7): e1004538. doi:10.1371/journal.pgen.1004538

**Published:** July 1, 2014

**Copyright:** © 2014 The *PLOS Genetics* Staff. This is an open-access article distributed under the terms of the Creative Commons Attribution License, which permits unrestricted use, distribution, and reproduction in any medium, provided the original author and source are credited.
